# Automated Workflow for Instant Labeling and Real-Time Monitoring of Monoclonal Antibody N-Glycosylation

Aron Gyorgypal<sup>1,2</sup>, Oscar Potter<sup>3</sup>, Antash Chaturvedi<sup>1</sup>, David N. Powers<sup>2</sup>, Shishir P. S. Chundawat<sup>1\*</sup>

<sup>1</sup>Department of Chemical and Biochemical Engineering, Rutgers University, Piscataway, New Jersey, USA

<sup>2</sup>Center for Drug Evaluation and Research, Office of Product Quality, Office of Biotechnology Products, Division of Biotechnology Review and Research II, U.S. Food and Drug Administration (FDA), Silver Spring, Maryland, USA

<sup>3</sup>Agilent Technologies, Inc., 5301 Stevens Creek Blvd Santa Clara, California, USA

\*Corresponding Author: Shishir P. S. Chundawat ([shishir.chundawat@rutgers.edu](mailto:shishir.chundawat@rutgers.edu))

**Keywords:** Biomanufacturing, process analytical technology, monoclonal antibody, N-glycosylation

**Disclaimer:** This article reflects the views of the author/s and should not be construed to represent FDA's views or policies.

## Abstract

With the transition toward continuous bioprocessing, process analytical technology (PAT) is becoming necessary for rapid and reliable in-process monitoring during biotherapeutics manufacturing. Bioprocess 4.0 is looking to build an end-to-end bioprocesses that includes PAT-enabled real-time process control. This is especially important for drug product quality attributes that can change during bioprocessing, such as protein N-glycosylation, a critical quality attribute for most monoclonal antibody (mAb) therapeutics. Glycosylation of mAbs is known to influence their efficacy as therapeutics and is regulated for a majority of mAb products on the market today. Currently, there is no method to truly measure N-glycosylation using on-line PAT, hence making it impractical to design upstream process control strategies. We recently described the N-GLYcanyzer: an integrated PAT unit that measures mAb N-glycosylation within 3 hours of automated sampling from a bioreactor. Here, we integrated Agilent's Instant PC (IPC) based chemistry workflow into the N-GLYcanyzer PAT unit to allow for nearly 10x faster mAb glycoforms analysis. Our methodology is explained in detail to allow for replication of the PAT workflow as well as present a case study demonstrating use of this PAT to autonomously monitor a mammalian cell perfusion process at the bench-scale to gain increased knowledge of mAb glycosylation dynamics during continuous biomanufacturing of biologics using Chinese Hamster Ovary (CHO) cells.

## Introduction

Implementation of advanced PAT and process control in the biopharmaceuticals and bioproducts manufacturing industries continues to lag behind the traditional petrochemical/chemical industry. The current goal towards bioprocess 4.0 is the creation of an end-to-end integrated bioprocess that runs, controls, and continuously improves the process following feed-back/forward control loops enabled by advances in automation and artificial intelligence<sup>1,2</sup>. However, due to inherent complexities in bioprocesses such as post-translational modifications of therapeutic proteins during biomanufacturing, the creation of PAT tools to continually monitor the critical quality attributes (CQA's) of biologics is a challenge in itself<sup>3-5</sup>. A current bottleneck for both bioprocess and bioproduct characterization is the combination of high-throughput and autonomous PAT with high-resolution product quality analytics<sup>6</sup>.

N-linked glycosylation of proteins has garnered attention as a critical quality attribute for many biologic products, especially monoclonal antibodies (mAbs), as macro-heterogeneity in mAb glycoform structures are known to influence the pharmacokinetics, pharmacodynamics, and immunogenicity of

50 the final drug product<sup>7,8</sup>. N-linked glycosylation is conserved for IgG monoclonal antibodies on their  
51 heavy chain at the Asn-297 site, with some products also having N-glycosylation in the variable region as  
52 well. The heterogeneity of N-linked glycosylation comes from the multitude of variations in the glycan  
53 branches due to the high number of sugar moieties possible as well as the specific linkages present that  
54 is influenced by the activity of different glycosidases and glycosyltransferases during cell growth,  
55 stationary, and death phases<sup>8,9</sup>. The glycosylation pattern tends to be also sensitive to the process  
56 parameters and the extracellular environment consequently. These parameters are known as critical  
57 process parameters (CPPs) and include cell culture temperature, pH, dissolved oxygen concentration,  
58 and agitation rate<sup>10-14</sup>. Because of this, a process must be well defined to make the glycosylation  
59 patterns reproducible between multiple batches<sup>15</sup>. Additional complexity is further added if the mAb  
60 product of interest is a biosimilar that has stricter tolerances for CQAs to match the originator or  
61 innovator drug product<sup>16,17</sup>.

62  
63 Released glycan analysis often involves enzymatic deglycosylation of mAbs isolated from the cell culture  
64 using Peptide:N-glycosidase F (PNGase F), followed by glycan labeling by suitable fluorophore tag and  
65 labeled glycan enrichment using solid phase extraction (SPE). Traditional methods involve isolated mAb  
66 denaturation before a 4-24 hour incubation period for deglycosylation followed by an optional cleanup  
67 step to remove deglycosylated protein from the solution. Next, a 2-3 hour incubation step is necessary  
68 for fluorescently labeling the released glycan using reductive amination to conjugate a fluorophore like  
69 2-aminobenzenamide (2-AB) to the reducing end of the glycans to increase analytical sensitivity. Finally,  
70 the excess label is then removed using solid phase extraction (SPE), and the sample is then dried and  
71 reconstituted into a suitable matrix before analysis by High-Performance Liquid Chromatography (HPLC)  
72 system coupled to a suitable Fluorescence Detector (FLD). This whole process can take anywhere from  
73 2-3 days from start to end<sup>18</sup>. However, newer technology can allow this workflow to be further  
74 streamlined, such as using proprietary PNGase F kits to reduce deglycosylation reaction times to under  
75 few minutes, as well as using instant labeling chemistries that allow for nearly instantaneous  
76 fluorophore-glycan conjugation. Such technologies can condense the overall N-glycan release and  
77 sample prep workflow to less than one hour<sup>19</sup>. Examples of such proprietary chemistry kits include  
78 Agilent's AdvanceBio Gly-X Technology, as well as Waters' GlycoWorks RapiFluor-MS<sup>20,21</sup>. While such  
79 recent innovations have been able to speed up sample preparation time as well as increase throughput  
80 using a 96-well plates design, these kits are not suitable for in-process real-time testing during  
81 manufacturing and are more suitable for quality control (QC) based analysis<sup>22</sup>.

82  
83 Here, we look to enable rapid near real-time analysis of mAb N-glycans by integrating the Agilent Gly-X  
84 Instant Procainamide (IPC) chemistry and workflow into the N-GLYcanalyzer PAT system. This will allow for  
85 faster mAb glycoforms analysis during bioprocessing compared to the traditional 2-AB labeling approach  
86 that was recently reported<sup>23</sup>. We also show the utility of using the IPC tag to deconvolute glycan peaks  
87 using at-line integrated liquid chromatography based mass spectrometry (LC-MS). We demonstrate how  
88 instant IPC chemistry can be integrated into an online PAT workflow for automated analysis of mAb  
89 glycoforms. Finally, we highlight a case study demonstrating the utility of this automated PAT workflow  
90 to rapidly monitor mAb glycoforms produced by a CHO cell perfusion bioprocess.

## 91 92 **Materials and Methods**

93  
94 **Cell line and shake flask cell culture:** The Chinese Hamster Ovary (CHO-K1) cell line producing a  
95 recombinant trastuzumab, a biosimilar for Herceptin, was kindly donated by GenScript Biotech  
96 Corporation (Piscataway, NJ). A seed train was started by thawing one ampule of cells ( $10 \times 10^6$  cell/mL)  
97 from the working seed bank into high intensity perfusion CHO (HIP-CHO) medium (Thermo Fischer

98 Scientific, Waltham, MA) into a 125 mL unbaffled shake flask (VWR, Radnor, PA) with a 40 mL working  
99 volume to a seed density of  $0.5 \times 10^6$  cells/mL containing 0.1% anticlumping agent (Thermo Fischer  
100 Scientific, Waltham, MA). The cells were grown at 37°C, 130 RPM, and 8% CO<sub>2</sub> in a New Brunswick S41i  
101 CO<sub>2</sub> Incubator (New Brunswick Eppendorf, Hamburg, Germany) for 4 days and passaged twice to  $0.5 \times 10^6$   
102 cell/mL into a 250 mL shake flask and then into a 500 mL shake flask, and then grown for 4 days before  
103 inoculation into the bioreactor.

104  
105 **Perfusion bioreactor cell culture:** The bioreactor cell culture experiments were conducted in a 3L glass  
106 bioreactor using Biostat B-DCU controller (Sartorius, Göttingen, Germany) with a working volume of  
107 1.75L. Temperature and pH control was initiated before inoculation and set at 37°C and pH 7.1,  
108 respectively. Dissolved oxygen (DO) was also brought to a setpoint of 50% DO. The pH was controlled by  
109 sparging either CO<sub>2</sub> or by bolus additions of 0.5M NaOH (Sigma Aldrich, St. Louis, MO). The bioreactor  
110 was inoculated to an initial density of  $0.5 \times 10^6$  cells/mL. Offline samples were taken daily to analyze  
111 various culture parameters (e.g., glucose, lactate, glutamate, glutamine, Na, K, Ca) on a BioProfile Flex2  
112 Analyzer (Nova Biomedical, Waltham, MA). Product titer was analyzed offline from spent media daily by  
113 protein A chromatography on the Agilent Bioinert 1260 HPLC system using a Bio-Monolith Recombinant  
114 Protein A column (Agilent Technologies, Santa Clara, CA). An XCell™ ATF system (Repligen, Waltham,  
115 MA) was used for steady-state perfusion slowly ramping up the exchange rate from 0.25 to 1.0 vessel  
116 volumes a day (VVD) between day 4 and day 8. The bleed rate was also adjusted proportionally with the  
117 permeate rate using the pumps to maintain a constant VVD and cell viability throughout the culture  
118 duration.

119  
120 **Off-line N-glycan sample preparation and analysis:** Offline N-glycan analysis was done using  
121 AdvanceBio Gly-X N-glycan prep with InstantPC (GX96-IPC, Agilent Technologies, Santa Clara, CA)  
122 following the manufacturer's instructions. Briefly, spent media was removed from the bioreactor daily  
123 and the sample was purified using a Protein A HP SpinTrap (Cytiva, Marlborough, MA) with 20mM  
124 phosphate buffer pH 7.2 as a binding buffer and 0.1% formic acid as the eluent. The sample was then  
125 neutralized using 1M HEPES Solution pH 8.0 to a neutral pH before buffer exchange into 50 mM HEPES  
126 solution pH 7.9 and then concentrated to ~2 g/L using a 10 kDa MWCO spin column (VWR, Radnor, PA).  
127 Next, 2 µL of Gly-X denaturant was added to 20 µL of the sample prior to heating it to 90°C for three  
128 minutes. After cooling, 2 µL of N-Glycanase working solution (1:1 Gly-X N-Glycanase, Gly-X Digest Buffer)  
129 was added, mixed, and incubated at 50°C for five minutes. Afterward, 5 µL of Instant PC Dye solution  
130 was added, mixed, and incubated for an additional 1 minute at 50°C. The sample was then diluted with  
131 150 µL of load/wash solution (2.5% formic acid, 97.5% acetonitrile (ACN)). Next, 400 µL of load/wash  
132 solution was added to the Gly-X Cleanup Plate along with the ~ 172 µL of sample. A vacuum was applied  
133 (<5 inches Hg) until the sample passed through. Samples were then washed twice with 600 µL of  
134 Load/Wash solution before being eluted into a collection plate with 100 µL of Gly-X InstantPC Eluent  
135 with vacuum (<2 inches Hg). These samples were run on a 1260 Infinity II Bio-Inert LC System (Agilent  
136 Technologies, Santa Clara, CA) using an AdvanceBio Glycan Mapping column 2.1 X 150 mm 2.7 micron  
137 (Agilent Technologies, Santa Clara, CA). Mobile phase A was 50 mM ammonium formate adjusted to pH  
138 4.4 using formic acid and mobile phase B was acetonitrile. The flow rate was set to 0.5 mL/min, and FLD  
139 was set to ex. 285 nm/ em. 345 nm, column temp was at 55°C. The initial eluent was held at 80% B for 2  
140 minutes then dropped immediately to 75% B. From 2 minutes to 30 minutes the eluent was changed  
141 from 75% B down to 67% B in a linear gradient, and then from 30 to 31 minutes it was decreased from  
142 67% B down to 40% B. From 31 to 33.5 minutes the ACN concentration was brought back to 80% at  
143 which level it was held until the end of the run at 45 minutes. Relative abundances of individual  
144 glycoforms was done on OpenLab CDS v3.5 (Agilent Technologies, Santa Clara, CA).

145

146 **Automated mAb titer analysis using N-GLYcanyzer:** Titer was checked at least once a day using the N-  
147 GLYcanyzer system using the ProSIA subunit (FIALab Instruments, Seattle, WA) following the method  
148 described in a previous study<sup>23</sup>. Briefly, bioreactor supernatant was pumped from the bioreactor  
149 through a filtration membrane and sent to the ProSIA system that integrated with a miniature protein A  
150 column. The column was machined in-house using PEEK (polyether ether ketone) material with an inner  
151 diameter of 2 mm and length of 30 mm and was packed with MabSelect SuRe Protein A resin  
152 (MilliporeSigma, Burlington, MA). Once mAb was adsorbed on the column the samples were washed  
153 with 20 mM phosphate buffer pH 7.2 and then eluted using 200  $\mu$ L of 0.1% formic acid. The eluted  
154 sample was sent through an in-line UV spectrometer (Ocean Optics, Dunedin, FL) that was integrated  
155 downstream of the Protein A column, measuring at 280 nm wavelength. The integrated peak was used  
156 to calculate protein titer against a 7-point calibration curve (MedChemExpress, Monmouth Junction,  
157 NJ). If the concentration was found to be sufficient, the sample of purified mAb was then used for  
158 released glycan sample preparation (as described below). However, if the concentration was found to be  
159 too low for the optimized automated N-GLYcanyzer method analytical range (i.e., less than 100  $\mu$ g mAb  
160 in eluent), a larger cell-free sample was automatically drawn from the reactor and purified to increase  
161 the amount of purified mAb. The sample with desired concentration was then sent to the second sub-  
162 unit (N-GLYprep) for further sample preparation of the glycans from mAb.

163

164 **Automated N-glycan preparation and analysis using N-GLYcanyzer:** Scheme 1 depicts the overall  
165 workflow (Scheme 1A) and the flow path of the N-GLYcanyzer system (Scheme 1B). After mAb protein  
166 purification, glycan analysis was initiated on the N-GLYprep subunit as shown in scheme 1B. The sample  
167 was eluted from the Protein A column (having a volume of 200  $\mu$ L as described above) and neutralized  
168 with 20  $\mu$ L of 1M HEPES solution, pH 8. The neutralized sample was then homogenized within the  
169 syringe pump and all but 40  $\mu$ L was sent to waste. Homogenization was done by aspirating and  
170 dispensing the sample to and from the syringe pump through a clear waste line. The remaining 40  $\mu$ L  
171 homogenized sample was mixed with 4  $\mu$ L of Gly-X denaturant, dispensed to the 90°C heated coil for 3  
172 minutes, then aspirated back to the syringe pump to allow it to cool to room temperature. For  
173 deglycosylation, 4  $\mu$ L of a N-Glycanase working solution was aspirated to the sample in the syringe,  
174 homogenized, and dispensed to the 50°C heated coil for 5 minutes and then aspirated back into the  
175 syringe pump. Labeling was done by aspirating 10  $\mu$ L of IPC label to the sample within the syringe and  
176 dispensing the sample to the 50°C heater for 1 minute and then aspirating back to the syringe. The  
177 sample was then homogenized, and all but 1  $\mu$ L was dispensed to waste. The 1  $\mu$ L sample was then  
178 diluted with 250  $\mu$ L of the wash solution (80% acetonitrile, 20% water) by aspirating the wash solution  
179 into the syringe and allowing it to mix with the 1  $\mu$ L of sample. The wash solution mixed sample was  
180 then loaded onto a 2.1 x 5 mm trapping column (821725-906, AdvanceBio Glycan Mapping Guard  
181 Column) placed on an external valve (G5631A, 1290 Infinity II Valve Drive, Agilent Technologies, Santa  
182 Clara, CA) and washed with another 250  $\mu$ L wash solution before the external valve was switched in-line  
183 with the analytical HPLC column and the HPLC gradient was started.

184

[Scheme 1]

185

## 186 Results and Discussion

187

188 **System Automation – Protein A Purification:** The system used a 2 mm x 30 mm length column that was  
189 packed with MabSelect SuRe Protein A resin to purify the monoclonal antibody from the extracellular  
190 broth of the bioreactor culture. The binding buffer was 20 mM phosphate buffer pH 7.2 and the elution  
191 buffer was 0.1% formic acid. The column was conditioned before use. A fixed volume of cell-free reactor  
192 culture (200  $\mu$ L) was removed using the filtration probe and pumped onto the protein A column. The

193 sample was washed with the binding buffer before elution with 200  $\mu$ L of 0.1% formic acid. During this  
194 time the eluent is monitored using UV 280 nm absorbance to calculate the mAb titer. If the  
195 concentration is too low for subsequent analysis the assay has been automated to be re-run at a higher  
196 sampling volume from the reactor to increase the final mAb concentration in the eluent. Afterwards the  
197 mAb eluent was neutralized to a pH of 7.9 – 8.0 using 20  $\mu$ L of 1M solution of HEPES at pH 8.0. Prior  
198 experiments used a Tris-base solution for neutralization; however, it was found that tris-base interfered  
199 with the IPC labeling chemistry and was therefore discontinued for the online workflow. A sensitivity  
200 study was also run to measure the lowest limit of detection of the assay that are shown in  
201 **supplementary figure S1**. Based on the sensitivity study, we found that a mAb concentration as low as  
202 0.1 g/L was sufficient for HPLC-FLD analysis, while 0.5 g/L gave better resolution of smaller eluting  
203 peaks. From this analysis it was decided that mAb would be concentrated to at least 0.5 g/L prior to  
204 glycan preparation post-protein A cleaning.

205  
206 [Scheme 2]

207  
208 **System automation – deglycosylation and labeling:** The integration of a bench-top assay based on  
209 manual steps into a flow-chemistry PAT system is non-trivial. Differences exist between the sample  
210 preparation for 2-AB and IPC based labeling chemistry. Labeling with 2-AB depends on a Schiff-base  
211 reductive amination of the released N-glycan reducing end moiety (after PNGase F treatment and  
212 spontaneous conversion of the glycosylamine product to a sugar aldehyde moiety) with the primary  
213 amine functional group of 2-AB forming an imine intermediate before reduction to a stable secondary  
214 amine. Conversely, the IPC method relies on a stable urea linkage formation between the instant  
215 procainamide label and the glycosylamine product formed immediately after PNGase F cleavage. This  
216 glycosylamine is unstable under non-alkaline conditions, losing its primary amine group which is  
217 necessary for the urea linkage formation<sup>24,25</sup>. The reaction schemes are summarized in **scheme 2**  
218 showing the PNGase F enzymatic reaction along with the subsequent IPC versus 2-AB based released N-  
219 glycan chemical reactions.

220 [Figure 1]

221  
222 A study was conducted to measure the labeling efficiency of IPC onto the glycosylamine as a function of  
223 PNGase F incubation time at two pH values: pH 7.5 and 8.0. The fluorescence intensity of GOF glycoform  
224 released from trastuzumab was monitored to examine the impact of PNGase F incubation time on  
225 relative concentration of glycosylamine intermediates release/labeled. This experiment provided some  
226 understanding of the relative amounts of glycosylamine intermediates formed after enzymatic cleavage  
227 to be readily available for IPC labeling. This provided insight to the optimum reaction time needed as  
228 PNGase F cleavage to release increasing concentration of glycosylamine intermediates was impacted by  
229 the subsequent hydrolysis of the intermediate to reducing sugars versus intermediate labeling by IPC  
230 probe. **Figure 1A** depicts representative chromatograms from the pH 7.5 assay condition. No bias was  
231 seen in the relative glycosylation pattern between all sample conditions and replicates for varying  
232 incubation times under either pH condition (data not shown). **Figure 1B** shows the integrated  
233 fluorescence intensity as arbitrary units (a.u.) of the most abundance labeled glycoform (GOF) as a  
234 function of the incubation time and pH. Interestingly, it was seen that in both cases the fluorescent  
235 intensity was high after 5 minutes of incubation, 12.94 $\pm$ 0.67 a.u. at pH 7.5 and 12.65 $\pm$ 0.32 a.u. at pH 8.0.  
236 The fluorescence intensity dropped at an incubation time of 10 minutes to 2.68 $\pm$ 0.33 a.u. (pH 7.5) and  
237 4.29 $\pm$ 2.41 a.u. (pH 8.0). However, the fluorescence value was regained again under the pH 8 condition  
238 after 30 minutes to 14.41 $\pm$ 1.42 a.u. and then stayed stable up to 30 minutes. However, under the pH 7.5  
239 conditions, the fluorescence value stayed low even up to 30 minutes and then slowly increased to level  
240 off only after around 60 minutes to around 8.23  $\pm$  1.53 a.u. While both conditions started with the same

241 amount of substrate/enzyme (i.e., mAb and PNGase F), the amount of free glycosylamine available for  
242 the IPC reaction is almost twice as high at the higher pH reaction condition after one hour of incubation  
243 time. This can be attributed to the solution being slightly more alkaline and thus increasing free  
244 glycosylamine stability in solution prior to labeling with IPC.

245  
246 To the best of our knowledge, there is no open literature that explains the dramatic decrease in free  
247 glycosylamine available to dye conjugation between the 5- and 10-minute reaction times. Furthermore,  
248 there are many potential unknowns in attempting to explain the mechanism behind this dynamic multi-  
249 step reaction kinetics behavior. For example, we still have limited knowledge of; (i) the extent of mAb  
250 denaturation that impacts subsequent PNGase F accessibility for glycan cleavage, (ii) the activity of  
251 PNGase F under varying pH conditions in the presence of the denaturant, and (iii) enzyme activity over  
252 time post initial burst phase as substrate available become rate-limiting. Earlier literature has  
253 characterized the kinetics of PNGase F, but not in the context of the glycosylamine formation and its  
254 subsequent degradation due to IPC labeling<sup>26,27</sup>. An additional unknown is the relative degradation rate  
255 of the intermediate glycosylamine to free-reducing sugar. Interestingly, there may be alternative chair  
256 conformations of the glycosylamine that may be labeled as well<sup>20</sup> as shown by Kimzey et al. within their  
257 application notes when first reporting on the IPC reagent for glycan labeling. Lastly, it is worth noting  
258 that pH does have an effect to the amount of glycosylamine available for IPC labeling, as it is known that  
259 the stability of glycosylamines is also pH dependent. While these arguments could explain the dynamic  
260 change in IPC labeled glycosylamine intermediate concentrations profile, further exploration was  
261 outside of the scope of the current project. In conclusion, to support automation and assay throughput  
262 we decided to use the 5-minute total incubation time for the enzymatic deglycosylation and IPC labeling  
263 step.

264  
265 **HILIC trap column sample enrichment and injection:** After glycans are deglycosylated and labeled with  
266 IPC, the samples must be purified to remove any excess label and other contaminants that may be  
267 present in solution. The offline, bench-top method uses a proprietary HILIC based material to remove  
268 such contaminants. This is done by diluting the labeled glycan samples with 0.1% formic acid in  
269 acetonitrile and then passing it through the proprietary HILIC material under vacuum, followed by three  
270 wash steps before eluting the bound glycan using a propriety eluent. For an online sample preparation  
271 methodology, the exact same steps cannot be easily replicated.

272 [Figure 2]

273  
274 This problem was solved by instead introducing a small HILIC guard column to function as a trap column  
275 on a 6-port external valve off the HPLC, which acts as an extension to the analytical column upstream.  
276 This column functions as an enrichment step after IPC labeling and removes most contaminants without  
277 significant loss of all labeled glycans. Most of the labeled sample is sent to waste except for 1  $\mu$ L which is  
278 diluted 1:250 with 80% acetonitrile and then injected into the trap column. Discarding the bulk of the  
279 labeled glycan sample facilitates adjusting the remaining solution to a weak HILIC eluent by addition of  
280 the 80% acetonitrile to better adsorb onto the HILIC trapping column. The remaining sample fraction is  
281 adequate because the fluorescence sensitivity of IPC labeled glycans is very high. The trapping column is  
282 then washed with another 250  $\mu$ L of 80% acetonitrile. This six-port valve configuration can be seen in  
283 **Figure 2B**. For valve position 1  $\rightarrow$  6: ports 1 and 4 contain the trapping column with port 5 as the inlet  
284 from the N-GLYcanzyer system allowing for the sample and wash solution to pass through to waste on  
285 port 6. In this valving position, the HPLC bypasses the trap column through ports 3 and 2. Once the  
286 sample is injected into the trap column and washed, the internal setting is switched to position 1  $\rightarrow$  2 in  
287 which the trap column is now in-line with the HPLC mobile phase and the analytical column. At this  
288 point, the glycans on the trap column act as the extension of the analytical column and with the start of

289 the mobile phase, the gradient decreases the concentration of the organic phase allowing for  
290 chromatography to take place. Surprisingly there was no peak broadening or peak shifting taking place  
291 with this online set-up and the chromatography for the online prepared samples ran nearly identically to  
292 the offline method prepared samples.

293  
294 Next, we investigated the impact of sample injection volume onto the trapping column to understand  
295 the trapping efficiency or sample recovery. This was done by varying volumes of labeled glycan samples  
296 and diluting them to 250  $\mu\text{L}$  before injection on to the N-GLYcanzyer unit. A sample of mAb around  $\sim 1$   
297 g/L was used for this experiment. The same sample was used for each injection to minimize batch-to-  
298 batch variability. Adjusting the injection volume and wash volume was also done to optimize this step,  
299 with 250  $\mu\text{L}$  found to give the best cleaning efficiency versus glycan recovery (data not shown). **Figure**  
300 **2B** shows the increase in fluorescence signal with the increase in prepared sample mass and is  
301 quantified for three of the most abundant glycoforms in **Figure 2C**. A linear response can be seen with  
302 the increase in sample mass up to 16  $\mu\text{L}$  of loaded sample ( $r=0.99^2$ ), with linearity lost after 16  $\mu\text{L}$ . This is  
303 quantified in terms of integrated fluorescence values as well as relative abundances in **Table 1A** and **1B**.  
304 There was no bias seen in the trastuzumab glycoform patterns upto 16  $\mu\text{L}$  equivalent mass of sample  
305 injected onto the column. At the highest sample loading, there was a slight loss in linearity and the  
306 glycan distribution showed a decrease in relative abundances for the smaller glycoforms and a  
307 proportional increase for the larger glycoforms. For example, the relative abundance of G0F fell from  
308  $48.8\% \pm 0.1\%$  to  $42.6\% \pm 0.2\%$ , and G1F and G1F' went from  $27.5 \pm 0.1\%$  and  $9.9\% \pm 0.0\%$ , respectively  
309 to  $32.1\% \pm 0.3\%$  and  $11.7\% \pm 0.2\%$  relative abundances, respectively. This loss in retention and increase  
310 in recovery bias was expected for the highest loadings of samples tested. While increasing the sample  
311 loading volume (volume of sample in mostly aqueous buffer) the proportionality of the organic phase  
312 (acetonitrile concentration) will decrease leading to weaker retention of smaller glycoforms.  
313 Subsequently, larger glycans will tend to have stronger adsorption to the stationary phase causing a bias  
314 in sample recovery. Due to these results, we suspect that the trapping column was not overloaded at  
315 even the higher injection volumes/masses, but instead it is more likely that the weaker mobile phase  
316 caused bias in glycan retention<sup>28,29</sup>.

317  
318 **Figure 3D** show the monoisotopic masses for each trastuzumab glycoform tagged with IPC and analyzed  
319 by LC-MS. While IPC is a fluorophore it also contains a tertiary amine which facilitates IPC labeled species  
320 ionization in positive mode electrospray ionization mass spectrometry (ESI-MS). The utility of the IPC tag  
321 for MS analysis is showcased here to facilitate the concept of using this system with an LC-MS to allow  
322 for unknown labeled glycan mass identification. Samples of trastuzumab were analyzed on an offline LC-  
323 MS using a slightly longer gradient to allow for increased chromatographic separation prior to MS  
324 detection. The LC system was identical as before while the MS system was an Agilent Ultivo Triple  
325 Quadrupole mass spectrometer that is compatible with the overall N-GLYcanzyer workflow.

326  
327 A similar workflow was proposed by Bénet et al. as an online methodology to clean 2-AB using a trap  
328 column<sup>30</sup>. This workflow injected an impure 2-AB labeled glycan reaction mixture onto an HPLC and  
329 trapped the glycans on a BEH amide packed trap column using a 75% acetonitrile isostatic flow for a  
330 fixed amount of time to wash the trap column of contaminants while retaining the oligosaccharides  
331 before changing the valve position in line with the analytical column. This valve position change  
332 reversed the flow on the trap column as it eluted onto the analytical column. However, in our design, we  
333 did not change the flow on the trap column. The previous online clean-up workflow was comparable  
334 with offline cleaning to remove excess 2-AB as well. Our work shows a similar approach can be adopted  
335 using IPC tag over the 2-AB tag while using a superficially porous HILIC trap column.

336

337 Ultimately, it was found that a large volume of glycan sample can be loaded onto the trapping column  
338 without causing bias during downstream analytical chromatography step for LC-FLD or LC-MS. The assay  
339 was optimized so that around 2  $\mu\text{L}$  of prepared labeled glycan sample will need to be diluted to 250  $\mu\text{L}$   
340 for the final online assay. This volume was chosen based on an analytical sensitivity criteria in case there  
341 is any loss in syringe aspiration and dispensation tolerances used during the bioprocess campaign. An  
342 increase in the sample volume (pre-dilution) would need only be considered if fluorescent response was  
343 found to be low, depending on the mAb glycoform relative composition.  
344

345 **Perfusion-based cell culture mAb glycoforms analysis:** To showcase the utility of the N-GLYcanalyzer  
346 system integrated with the IPC chemistry workflow, we studied a perfusion bioprocess producing a  
347 trastuzumab biosimilar. Perfusion mode of operation can become challenging to measure glycoforms  
348 since the mAb titers are considerably lower than that of a fed-batch counterpart as the product is  
349 constantly being harvested and cells are being bled to maintain a pseudo-steady state. Titer was  
350 measured every day starting at day 0, with glycoform analysis only started once a detectable  
351 concentration of mAb was seen in the culture on day 4. Culture harvesting was also started on day 4 at a  
352 0.25 VVD, and cell bleeding started around day 6 as the viable cell density approached 20 million  
353 cells/mL. At this point, the perfusion rate was changed to 1.0 VVD with the bleed, and harvests were  
354 changed proportionally to maintain a semi-constant cell density throughout the 20-day culture.  
355

356 **Figure 3A** shows the viable cell density and viability over the 20-day cell culture period. The viability  
357 stayed above 90% throughout the culture run and viable cell density maintained roughly between 18  
358 and 23 million cells/mL. **Figure 3B** shows the titer monitored within the reactor throughout the culture  
359 using the online N-GLYcanalyzer system as well as the standard offline analysis method. The  
360 measurements were taken once a day until day 4 and then roughly every 8 hours using the N-  
361 GLYcanalyzer system. The offline measurements were done by taking at least two technical replicates  
362 ( $n=2$ ), and the online measurements were done once per analysis. The titers measured under both  
363 systems showed very similar trends, with the offline measurements giving a slightly higher  
364 concentration. Once at a steady state the mAb space-time yield (STY) remained between 0.08 and 0.12  
365 g/L/day through the culture.  
366

367 The glycan indices (GI) calculated based on all detected trastuzumab glycoforms are shown in **Figure 3C**  
368 and **Figure 3D**. The relative galactosylation index was measured and calculated by the summation of all  
369 galactosylated glycoforms divided by the summation of all glycoforms, giving the relative level of mAb  
370 glycoforms galactosylation within the reactor. The results follow a similar trend as seen in our recent  
371 publication<sup>23</sup> where the galactosylation rate tends to be high through the first few days of production  
372 (i.e., ~38% rel. galactosylation) and then sharply declines once the cells reach a pseudo-stationary phase  
373 (e.g., ~24% rel. galactosylation). The relative galactosylation rate is still within the quality tolerances set  
374 by the FDA based on a public release filing for a trastuzumab biosimilar<sup>31</sup>. The relative afucosylation  
375 index increased over time from around 4% to 5.5% at the end of the culture. This afucosylation index  
376 would be technically out of specification for a US-trastuzumab biosimilar based on a filing for another  
377 trastuzumab biosimilar as referenced above.  
378

379 Madabhushi et al. proposed that the declining levels of relative mAb galactosylation are caused by an  
380 increase in the cellular productivity of mAb that results in decreased residence time within the Golgi  
381 apparatus and hence incomplete addition of terminal sugars like galactose to the N-glycan backbone<sup>32</sup>.  
382 Using the N-GLYcanalyzer PAT system, it will be possible in the future to understand the dynamic changes  
383 in mAb N-glycosylation more frequently to better quantify the rates of change over time, and develop  
384 novel process control strategies to achieve bespoke mAb glycoform profiles. Incorporating a similar PAT



385 system with an advanced multi-omics approach can also help reveal subtle changes within cellular  
386 pathways to gain a fundamental understanding of the metabolic bottlenecks impacting protein  
387 glycosylation.

### 388 389 **Conclusion**

390  
391 In this study, we have integrated a commercially available N-glycan release/labeling kit chemistry into  
392 the N-GLYcanzyer flow chemistry PAT system. This proof of concept system allows for real-time  
393 monitoring of a bioprocess to monitor protein N-glycosylation which could allow for future  
394 implementation of advanced control strategies during industrial-scale biologic biomanufacturing. The  
395 chemistry of glycosylamine formation during the enzymatic deglycosylation step was studied to  
396 understand how the relative formation and degradation rates over time at varying pH's impact analytical  
397 sensitivity. A trapping column was introduced to the PAT flow system to allow for more accurate IPC  
398 labeled glycan capture, enrichment, and injection into a U/HPLC analytical column for fluorescence or  
399 mass spectrometric based product detection. The trap column was also characterized by exploring the  
400 sample matrix impact on glycan trapping. Lastly, we used the N-GLYcanzyer for automated real-time  
401 glycan analysis during a bench scale perfusion bioprocess to demonstrate the utility of the PAT system  
402 to measure changes in mAb glycosylation over time, especially monitoring the relative changes in  
403 galactosylation and afucosylation indices, two metrics that influence an antibody's pharmacodynamics  
404 and pharmacokinetics. The N-GLYcanzyer PAT system will allow for developing a fundamental  
405 understanding of the intra/extra-cellular pathways impacting protein glycosylation dynamic flux during  
406 both fed-batch and perfusion bioprocessing. Further, such a PAT will allow the development of  
407 advanced process control strategies that can autonomously adapt to undesirable process perturbations,  
408 such as pH and temperature shifts, as well as desirable perturbations, such as the addition of specific  
409 nutrients and media modulators (e.g., sugars, cofactors), that affect the glycosylation pathway to impact  
410 drug quality.

### 411 412 413 **Author contributions:**

414  
415 *Aron Gyorgypal*: Conceptualization, Investigation, Methodology, Validation, System Set-up, Formal  
416 Analysis, Writing – Original draft, Writing: review & editing. *Oscar Potter*: Investigation, Methodology,  
417 Conceptualization, Supervision, Writing – review & editing. *Antash Chaturvedi*: Investigation, Writing –  
418 review & editing. *David N. Powers*: Investigation, System Set-up, Validation, Writing – review & editing.  
419 *Shishir P.S. Chundawat*: Conceptualization, Investigation, Supervision, Writing – review & editing

### 420 421 422 **Acknowledgments:**

423  
424 This work was supported by the U.S. Food and Drug Administration (FDA) through the FDA-CBER Award  
425 1R01FD006588, Agilent Technologies University Relations Grant 4481, PC5.2-112 NIIMBL Project Award,  
426 as well as supported in part by the appointment of Aron Gyorgypal to the Research Participation  
427 Program at FDA, administered by ORAU through the U.S. Department of Energy Oak Ridge Institute for  
428 Science and Education (ORISE). The authors would like to thank Agilent Technologies Inc. (Mr. Wayne  
429 Heacock, and Dr. Ace Galermo) for their extensive and timely support of this project. As well as the  
430 Office of Biotechnology Products (OBP) Bioprocessing Lab (Dr. Cyrus Agarabi, Dr. Erica Fratz-Berilla, Mrs.  
431 Casey Kohnhorst) at the U.S. FDA Center for Drug Evaluation and Research (CDER) for their support in

432 this project. The authors also thank GenScript Biotech Corporation (Piscataway, NJ) for the Trastuzumab  
433 cell line gift to Rutgers University.  
434  
435

436 **References**

- 437 (1) Gargalo, C. L.; de las Heras, S. C.; Jones, M. N.; Udugama, I.; Mansouri, S. S.; Krühne, U.; Gernaey,  
438 K. V. Towards the Development of Digital Twins for the Bio-Manufacturing Industry. In *Advances*  
439 *in Biochemical Engineering/Biotechnology*; Springer Berlin Heidelberg: Berlin, Heidelberg, 2020;  
440 pp 1–34. [https://doi.org/10.1007/10\\_2020\\_142](https://doi.org/10.1007/10_2020_142).
- 441 (2) Coffman, J.; Brower, M.; Connell-Crowley, L.; Deldari, S.; Farid, S. S.; Horowski, B.; Patil, U.;  
442 Pollard, D.; Qadan, M.; Rose, S.; Schaefer, E.; Shultz, J. A Common Framework for Integrated and  
443 Continuous Biomanufacturing. *Biotechnol. Bioeng.* **2021**, *118* (4), 1735–1749.  
444 <https://doi.org/10.1002/bit.27690>.
- 445 (3) Chopda, V.; Gyorgypal, A.; Yang, O.; Singh, R.; Ramachandran, R.; Zhang, H.; Tsilomelekis, G.;  
446 Chundawat, S. P. S.; Ierapetritou, M. G. Recent Advances in Integrated Process Analytical  
447 Techniques, Modeling, and Control Strategies to Enable Continuous Biomanufacturing of  
448 Monoclonal Antibodies. *J. Chem. Technol. Biotechnol.* **2022**, *97* (9), 2317–2335.  
449 <https://doi.org/10.1002/jctb.6765>.
- 450 (4) Stolfa, G.; Smonskey, M. T.; Boniface, R.; Hachmann, A. B.; Gulde, P.; Joshi, A. D.; Pierce, A. P.;  
451 Jacobia, S. J.; Campbell, A. CHO-Omics Review: The Impact of Current and Emerging Technologies  
452 on Chinese Hamster Ovary Based Bioproduction. *Biotechnol. J.* **2018**, *13* (3), 1–14.  
453 <https://doi.org/10.1002/biot.201700227>.
- 454 (5) Kotidis, P.; Kontoravdi, C. Harnessing the Potential of Artificial Neural Networks for Predicting  
455 Protein Glycosylation. *Metab. Eng. Commun.* **2020**, *10* (May), e00131.  
456 <https://doi.org/10.1016/j.mec.2020.e00131>.
- 457 (6) Konstantinidis, S.; Kong, S.; Titchener-Hooker, N. Identifying Analytics for High Throughput  
458 Bioprocess Development Studies. *Biotechnol. Bioeng.* **2013**, *110* (7), 1924–1935.  
459 <https://doi.org/10.1002/bit.24850>.
- 460 (7) Higel, F.; Seidl, A.; Sörgel, F.; Friess, W. N-Glycosylation Heterogeneity and the Influence on  
461 Structure, Function and Pharmacokinetics of Monoclonal Antibodies and Fc Fusion Proteins. *Eur.*  
462 *J. Pharm. Biopharm.* **2016**, *100*, 94–100. <https://doi.org/10.1016/j.ejpb.2016.01.005>.
- 463 (8) Boune, S.; Hu, P.; Epstein, A. L.; Khawli, L. A. Principles of N-Linked Glycosylation Variations of  
464 IgG-Based Therapeutics: Pharmacokinetic and Functional Considerations. *Antibodies* **2020**, *9* (2),  
465 22. <https://doi.org/10.3390/antib9020022>.
- 466 (9) Butters, T. D. Control in the N-Linked Glycoprotein Biosynthesis Pathway. *Chem. Biol.* **2002**, *9*  
467 (12), 1266–1268. [https://doi.org/10.1016/S1074-5521\(02\)00290-9](https://doi.org/10.1016/S1074-5521(02)00290-9).
- 468 (10) Yang, O.; Ierapetritou, M. Mab Production Modeling and Design Space Evaluation Including  
469 Glycosylation Process. *Processes* **2021**, *9* (2), 1–19. <https://doi.org/10.3390/pr9020324>.
- 470 (11) Ivarsson, M.; Villiger, T. K.; Morbidelli, M.; Soos, M. Evaluating the Impact of Cell Culture Process  
471 Parameters on Monoclonal Antibody N-Glycosylation. *J. Biotechnol.* **2014**, *188*, 88–96.  
472 <https://doi.org/10.1016/j.jbiotec.2014.08.026>.
- 473 (12) Sou, S. N.; Sellick, C.; Lee, K.; Mason, A.; Kyriakopoulos, S.; Polizzi, K. M.; Kontoravdi, C. How Does  
474 Mild Hypothermia Affect Monoclonal Antibody Glycosylation? *Biotechnol. Bioeng.* **2015**, *112* (6),  
475 1165–1176. <https://doi.org/10.1002/bit.25524>.
- 476 (13) Brunner, M.; Fricke, J.; Kroll, P.; Herwig, C. Investigation of the Interactions of Critical Scale-up  
477 Parameters (PH, PO<sub>2</sub> and PCO<sub>2</sub>) on CHO Batch Performance and Critical Quality Attributes.  
478 *Bioprocess Biosyst. Eng.* **2017**, *40* (2), 251–263. <https://doi.org/10.1007/s00449-016-1693-7>.
- 479 (14) Alhuthali, S.; Kotidis, P.; Kontoravdi, C. Osmolality Effects on CHO Cell Growth , Cell Volume ,  
480 Antibody Productivity and Glycosylation. **2021**.
- 481 (15) Goswami, S.; Wang, W.; Arakawa, T.; Ohtake, S. Developments and Challenges for MAb-Based  
482 Therapeutics. *Antibodies* **2013**, *2* (4), 452–500. <https://doi.org/10.3390/antib2030452>.
- 483 (16) Duivelshof, B. L.; Jiskoot, W.; Beck, A.; Veuthey, J. L.; Guillaume, D.; D’Atri, V. Glycosylation of

- 484 Biosimilars: Recent Advances in Analytical Characterization and Clinical Implications. *Anal. Chim.*  
485 *Acta* **2019**, *1089*, 1–18. <https://doi.org/10.1016/j.aca.2019.08.044>.
- 486 (17) Rathore, A. S.; Chhabra, H.; Bhargava, A. Approval of Biosimilars: A Review of Unsuccessful  
487 Regulatory Filings. *Expert Opin. Biol. Ther.* **2021**, *21* (1), 19–28.  
488 <https://doi.org/10.1080/14712598.2020.1793954>.
- 489 (18) France, R. R.; Cumpstey, I.; Butters, T. D.; Fairbanks, A. J.; Wormald, M. R. Fluorescence Labelling  
490 of Carbohydrates with 2-Aminobenzamide (2AB). *Tetrahedron: Asymmetry* **2000**, *11* (24), 4985–  
491 4994. [https://doi.org/10.1016/S0957-4166\(00\)00477-8](https://doi.org/10.1016/S0957-4166(00)00477-8).
- 492 (19) Tiwold, E.; Gyorgypal, A.; Chundawat, S. Recent Advances in Biologic Therapeutic N-Glycan  
493 Preparation Techniques and Analytical Methods for Facilitating Biomanufacturing Automation.  
494 *ChemRxiv* **2022**.
- 495 (20) Kimzey, M.; Szabo, Z.; Sharma, V.; Gyenes, A.; Tep, S.; Taylor, A.; Jones, A.; Hyche, J.; Haxo, T.;  
496 Vlasenko, S. Development of an Instant Glycan Labeling Dye for High Throughput Analysis by  
497 Mass Spectrometry. *ProZyme* **2015**, *25*, 1295–1295.
- 498 (21) Lauber, M. A.; Yu, Y.-Q.; Brousmiche, D. W.; Hua, Z.; Koza, S. M.; Magnelli, P.; Guthrie, E.; Taron,  
499 C. H.; Fountain, K. J. Rapid Preparation of Released N -Glycans for HILIC Analysis Using a Labeling  
500 Reagent That Facilitates Sensitive Fluorescence and ESI-MS Detection. *Anal. Chem.* **2015**, *87* (10),  
501 5401–5409. <https://doi.org/10.1021/acs.analchem.5b00758>.
- 502 (22) Kinoshita, M.; Yamada, K. Recent Advances and Trends in Sample Preparation and Chemical  
503 Modification for Glycan Analysis. *J. Pharm. Biomed. Anal.* **2022**, *207*, 114424.  
504 <https://doi.org/10.1016/j.jpba.2021.114424>.
- 505 (23) Gyorgypal, A.; Chundawat, S. P. S. Integrated Process Analytical Platform for Automated  
506 Monitoring of Monoclonal Antibody N-Linked Glycosylation. *Anal. Chem.* **2022**, *94* (19), 6986–  
507 6995. <https://doi.org/10.1021/acs.analchem.1c05396>.
- 508 (24) Isbell, H. S.; Frush, H. L. EFFECT OF PH IN THE MUTAROTATION AND HYDROLYSIS OF  
509 GLYCOSYLAMINES. *J. Am. Chem. Soc.* **1950**, *72* (2), 1043–1044.  
510 <https://doi.org/10.1021/ja01158a527>.
- 511 (25) Isbell, H. S.; Frush, H. L. Mutarotation, Hydrolysis, and Rearrangement Reactions of  
512 Glycosylamines. *J. Org. Chem.* **1958**, *23* (9), 1309–1319. <https://doi.org/10.1021/jo01103a019>.
- 513 (26) Du, J. J.; Klontz, E. H.; Guerin, M. E.; Trastoy, B.; Sundberg, E. J. Structural Insights into the  
514 Mechanisms and Specificities of IgG-Active Endoglycosidases. *Glycobiology* **2020**, *30* (4), 268–  
515 279. <https://doi.org/10.1093/GLYCOB/CWZ042>.
- 516 (27) Bodnar, J.; Szekrenyes, A.; Szigeti, M.; Jarvas, G.; Krenkova, J.; Foret, F.; Guttman, A. Enzymatic  
517 Removal of N-Glycans by PNGase F Coated Magnetic Microparticles. *Electrophoresis* **2016**, *37*  
518 (10), 1264–1269. <https://doi.org/10.1002/elps.201500575>.
- 519 (28) Qing, G.; Yan, J.; He, X.; Li, X.; Liang, X. Recent Advances in Hydrophilic Interaction Liquid  
520 Interaction Chromatography Materials for Glycopeptide Enrichment and Glycan Separation. *TrAC*  
521 *Trends Anal. Chem.* **2020**, *124*, 115570. <https://doi.org/10.1016/j.trac.2019.06.020>.
- 522 (29) Qiao, L.; Shi, X.; Xu, G. Recent Advances in Development and Characterization of Stationary  
523 Phases for Hydrophilic Interaction Chromatography. *TrAC Trends Anal. Chem.* **2016**, *81*, 23–33.  
524 <https://doi.org/10.1016/j.trac.2016.03.021>.
- 525 (30) Bénet, T.; Austin, S. On-Line Cleanup for 2-Aminobenzamide-Labeled Oligosaccharides. *Anal.*  
526 *Biochem.* **2011**, *414* (1), 166–168. <https://doi.org/10.1016/j.ab.2011.03.002>.
- 527 (31) Mylan. *FDA Oncologic Drugs Advisory Committee Meeting - MYL-14010 (Mylan's Proposed*  
528 *Biosimilar to Trastuzumab)*; **2017**.
- 529 (32) Madabhushi, S. R.; Podtelezhnikov, A. A.; Murgolo, N.; Xu, S.; Lin, H. Understanding the Effect of  
530 Increased Cell Specific Productivity on Galactosylation of Monoclonal Antibodies Produced Using  
531 Chinese Hamster Ovary Cells. *J. Biotechnol.* **2021**, *329* (February), 92–103.

532  
533

<https://doi.org/10.1016/j.jbiotec.2021.01.023>.

534 Scheme:  
535

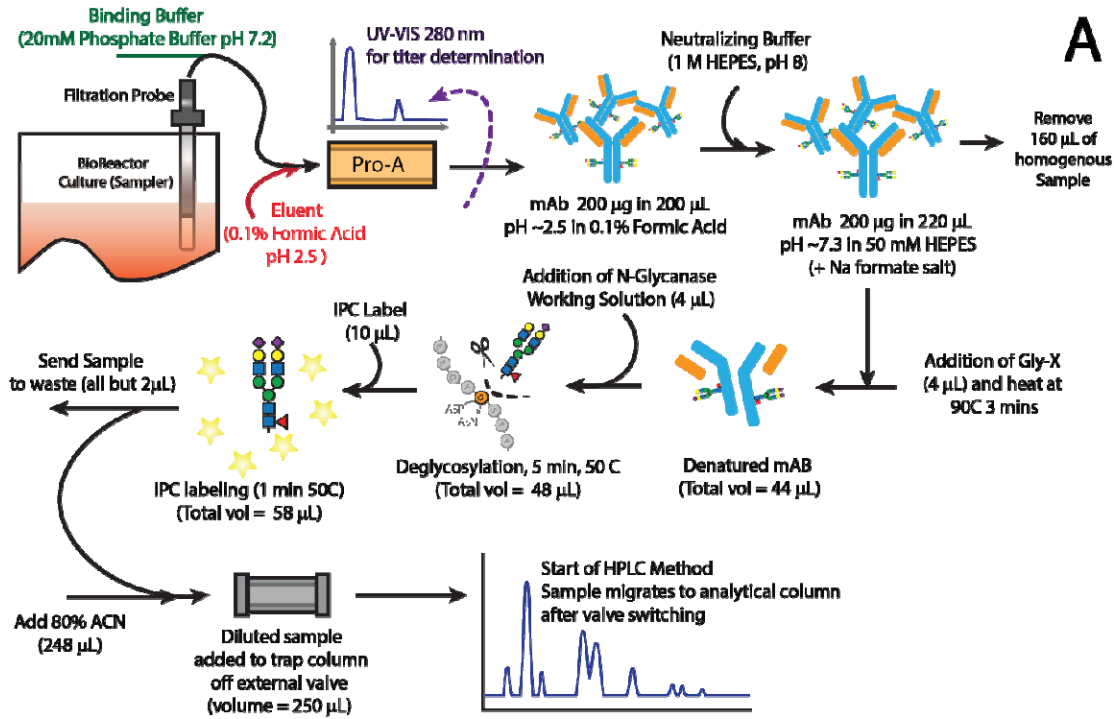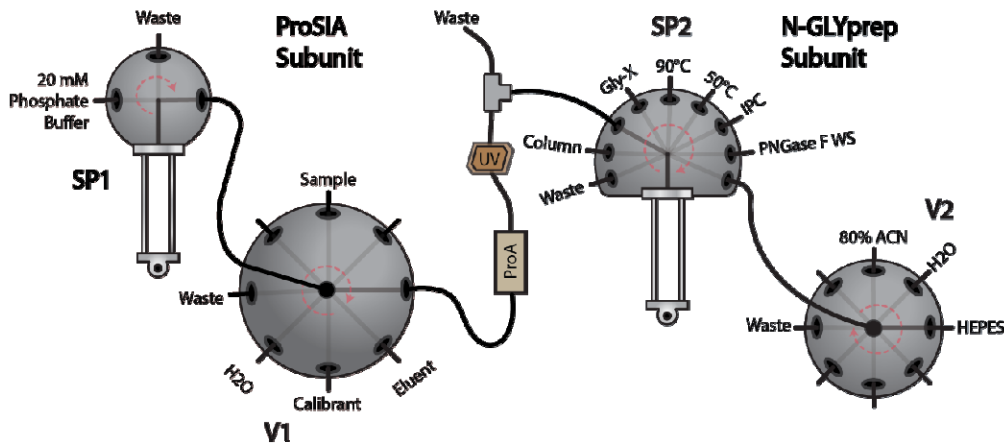

536  
537 **Scheme 1: Instant PC glycan labeling chemistry workflow integration with N-GLYcanizer PAT system.** (1A)  
538 illustrates sample preparation process outlined within the methods section while (1B) shows the flow paths for  
539 sample preparation including syringe pumps 1 and 2 (SP1 and SP2, respectively) as well as the two associated  
540 valves (V1 and V2, respectively) within the overall workflow. The colors indicate different subunits: red indicates  
541 ProSIA system while blue indicates the N-GLYprep subunit, and gray is found in between the two subunits.  
542

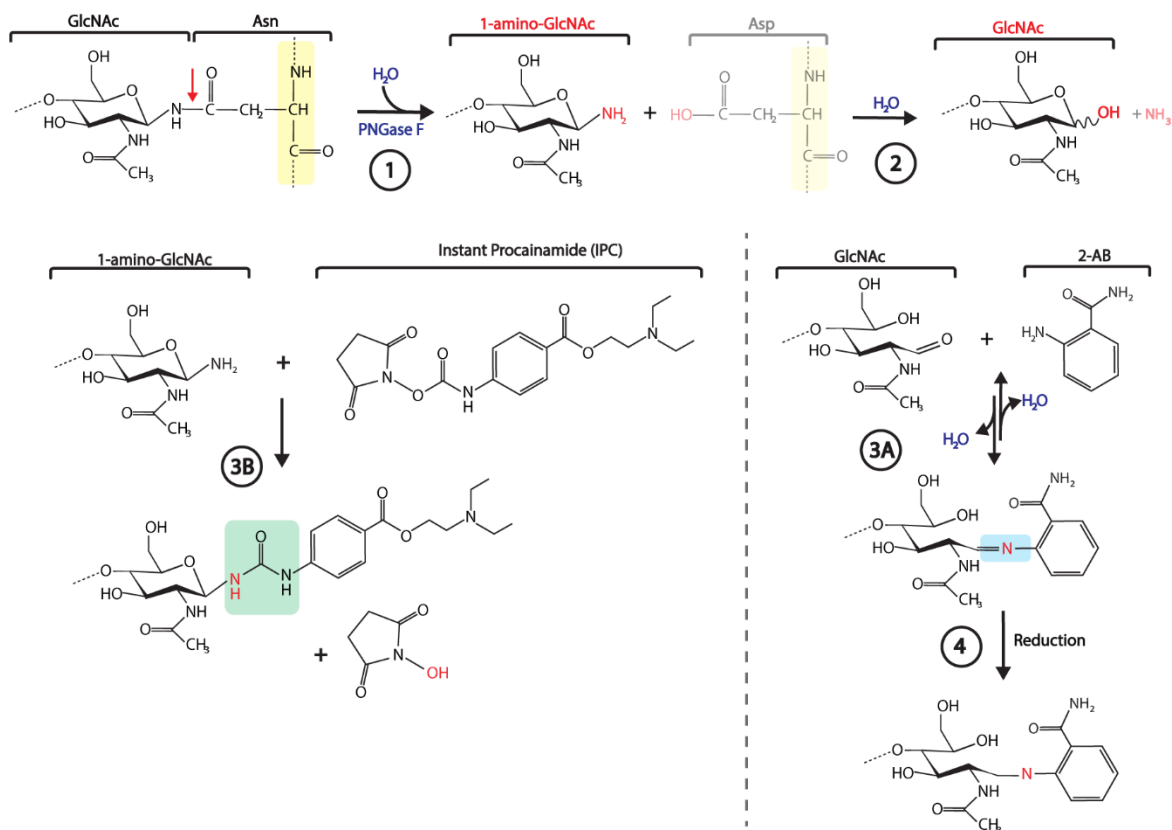

543  
 544 **Scheme 2: Reaction scheme associated with the enzymatic deglycosylation reaction followed by labeling**  
 545 **chemistries using IPC versus 2-AB is shown here.** In Step (1) the denatured antibody is treated with PNGase F that  
 546 cleaves the innermost N-acetylglucosamine (GlcNAc) of the N-glycan from the amino-acid backbone attached via  
 547 the asparagine residue. This reaction releases the N-glycan oligosaccharide from the antibody protein backbone  
 548 leaving a glycosylamine (1-amino-GlcNAc) intermediate while converting the Asn residue to an aspartate (Asp)  
 549 residue. The deglycosylated antibody is no longer needed for the subsequent reactions and is shown as faded in  
 550 the reaction scheme. In Step (2) the reaction of the glycosylamine intermediate under slightly non-alkaline  
 551 condition and prolonged reaction time in presence of water will lead to loss of an ammonia group that leaves  
 552 behind the reducing sugar GlcNAc intermediate. This free reducing sugar can be used as substrate for subsequent  
 553 reductive amination reaction. In Step (3A) in the presence of a reactive amine such as 2-AB (a fluorophore) under  
 554 high temperature and acidic reaction conditions the reducing sugar moiety of the N-glycan can react to form an  
 555 imine intermediate (as shown highlighted in blue), which is unstable in water. In Step (4) the imine intermediate  
 556 can be converted to a stable secondary amine in the presence of a strong reducing agent, and this final product is a  
 557 N-glycan that is tagged with a 2-AB fluorophore. (3B) Conversely, the glycosylamine intermediate can  
 558 instantaneously react with IPC to form a urea linkage (highlighted in green) under moderate reaction conditions  
 559 leaving behind an N-Hydroxysuccinimide (NHS) by-product. Here the final product is a N-glycan that is tagged with  
 560 a IPC fluorophore group.  
 561

562 Figures:  
563

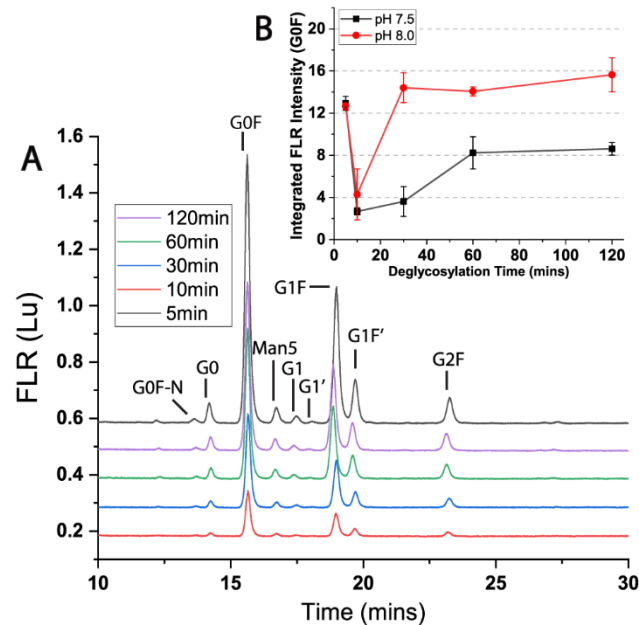

564  
565 **Figure 1. Impact on enzymatic deglycosylation reaction time on glycosylamine formation and labeling by IPC:**  
566 Monoclonal antibody (~1 g/L) is buffer exchanged into HEPES solution at either pH 7.5 or pH 8.0 and then  
567 deglycosylated with PNGase F for varying incubation times from 5 minutes to upwards of 120 minutes (2 hours).  
568 Deglycosylated mAbs are all subjected to labeling with IPC immediately after their incubation times, cleaned  
569 offline, and then analyzed by HPLC-FLD. **(1A)** Representative chromatograms for the pH 7.5 reaction conditions  
570 showing changes in fluorescent intensity over reaction time is shown. **(1B)** Integration of the G0F glycoform to  
571 show changes in integrated fluorescence intensity between the two pH conditions over time showing an increase  
572 in the amount of labeled glycosylamine at the higher pH condition. All samples were run in  $n \leq 3$  replicates.  
573



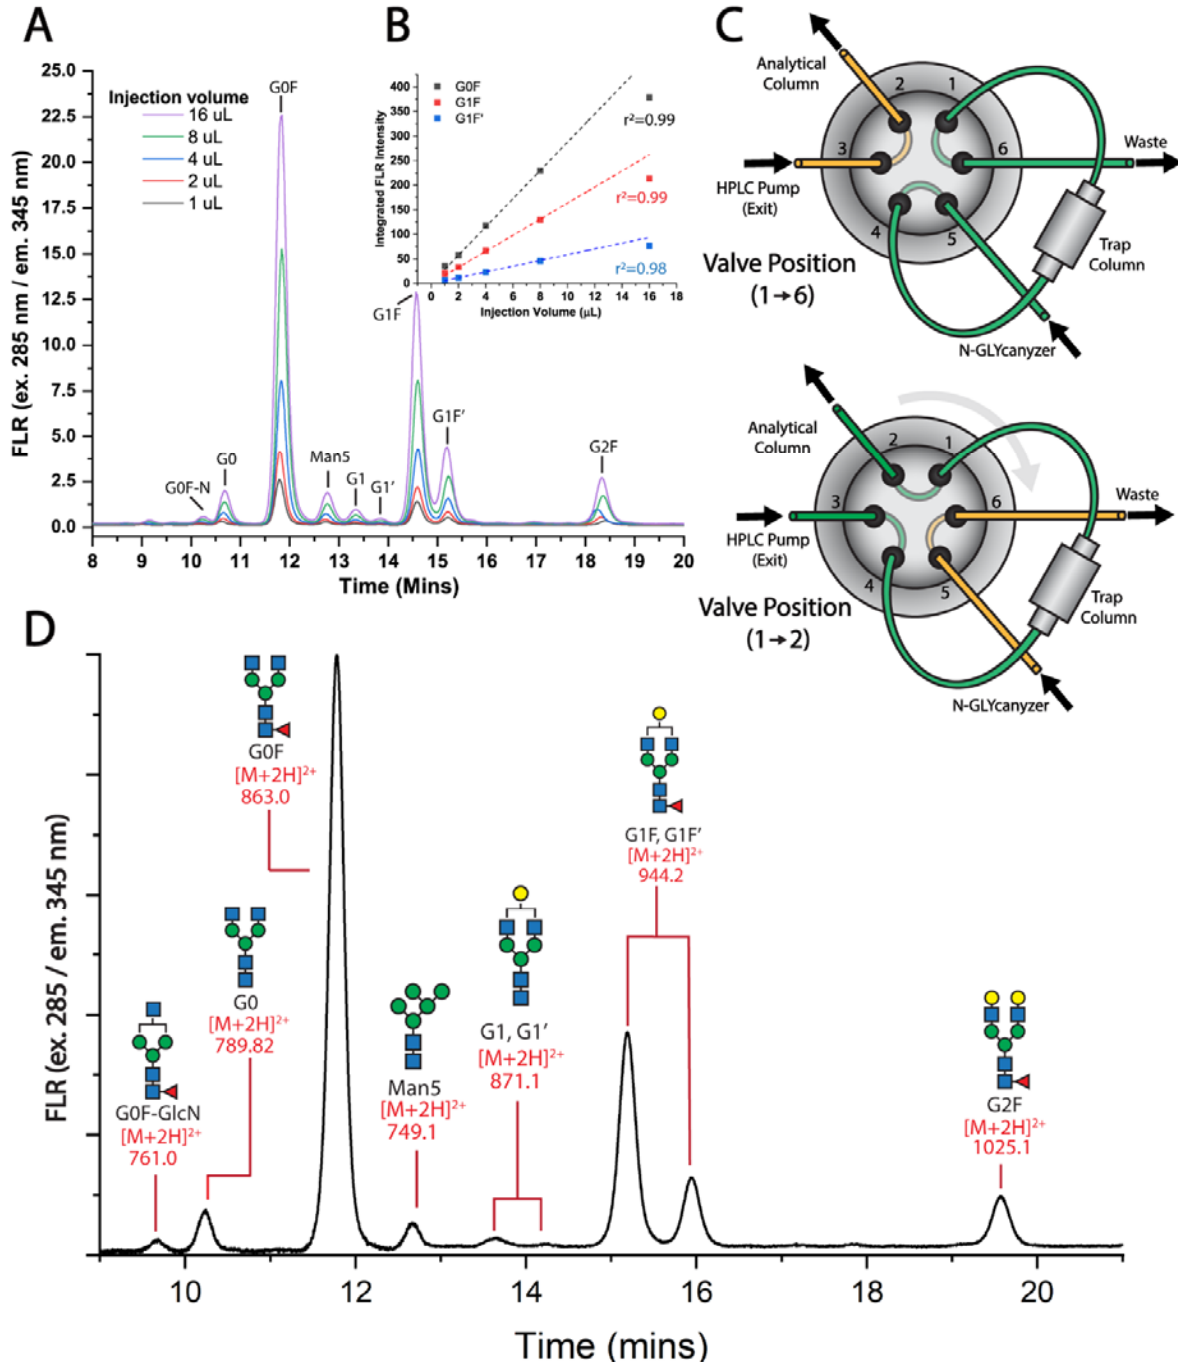

574  
575  
576  
577  
578  
579  
580  
581  
582  
583  
584  
585

**Figure 2.** IPC labeled glycan sample cleanup using trap enables efficient labeled glycan separation on analytical column and detection using fluorescence and mass spectrometric detection methods: Increasing injection volumes of IPC labeled N-glycan sample does not cause bias towards relative trastuzumab glycoform abundances at lower injection volumes (ideally < 16  $\mu$ l) onto the trap column. (2A) shows the injection and washing of different volumes of samples within a 250  $\mu$ l matrix containing 80% acetonitrile and 20% water with no significant variation in residence time on column. (2B) Injection volumes for the three major glycoforms from the trastuzumab biosimilar, while Table 1 shows all glycoforms in tabulated form. (2C) The internal movement of external valve from “sample loading” valve position (1-6) to “HPLC analysis” valve position (1-2). The green lines represent the flow path taken by the sample during specific preparation and analysis steps. (2D) Example HPLC-FLD chromatogram of eluting glycoforms that were also confirmed using an offline LC-MS to indicate the specific mono-isotopic masses detected for each eluting glycan peak.

586

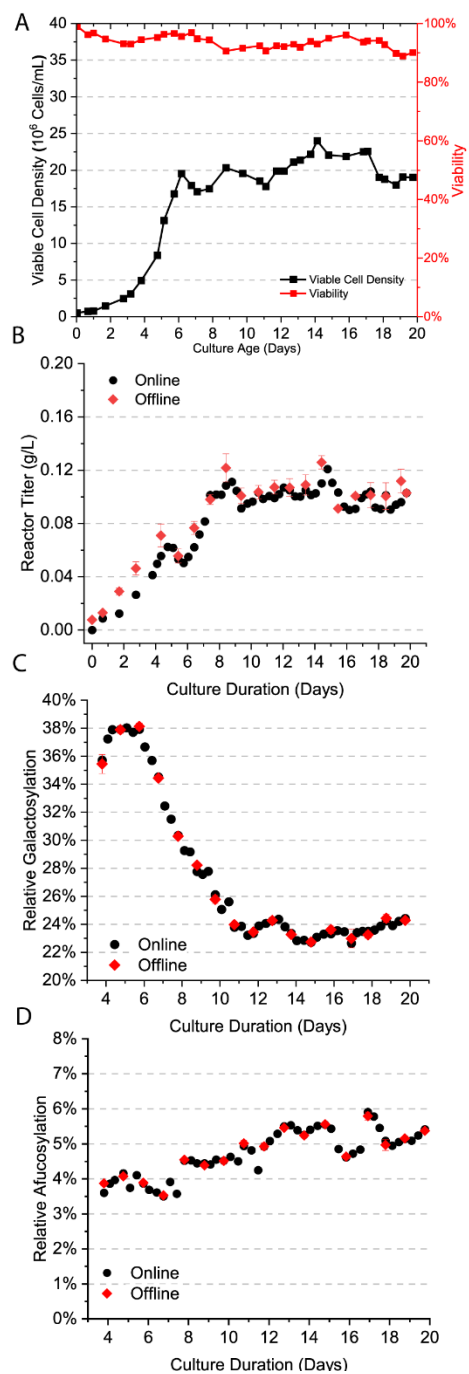

587  
588  
589  
590  
591  
592  
593  
594

**Figure 3. Online (in black) versus offline (in red) analysis of continuous perfusion bioreactor for mAb titer and major glycan indices are shown here. (3A) Viable cell density and viability over cell culture. (3B) Reactor mAb titer, (3C) Relative mAb galactosylation, and (3D) Relative mAb afucosylation for trastuzumab. Here, online analysis was done using the integrated N-GLYcanizer PAT system employing the IPC workflow, while offline analysis was done using standard offline methods.**

595  
596 Tables:  
597

| 1A                   | Glycan | Injection size ( $\mu\text{L}$ ) (AVG+STD) n=2 |                  |                   |                   |                   |                   |
|----------------------|--------|------------------------------------------------|------------------|-------------------|-------------------|-------------------|-------------------|
|                      |        | 1                                              | 2                | 4                 | 8                 | 16                | 32                |
| Integrated FLR Value | G0F-GN | 0.54 $\pm$ 0.02                                | 0.95 $\pm$ 0.04  | 1.22 $\pm$ 0.01   | 2.41 $\pm$ 0.02   | 4.79 $\pm$ 0.02   | 5.76 $\pm$ 0.50   |
|                      | G0     | 2.84 $\pm$ 0.05                                | 4.62 $\pm$ 0.06  | 8.39 $\pm$ 0.03   | 15.96 $\pm$ 0.08  | 28.01 $\pm$ 1.27  | 32.57 $\pm$ 0.74  |
|                      | G0F    | 35.57 $\pm$ 0.16                               | 57.16 $\pm$ 0.06 | 117.53 $\pm$ 0.67 | 229.92 $\pm$ 0.15 | 378.44 $\pm$ 3.63 | 484.24 $\pm$ 2.26 |
|                      | Man5   | 2.24 $\pm$ 0.06                                | 3.53 $\pm$ 0.14  | 7.22 $\pm$ 0.10   | 14.44 $\pm$ 0.25  | 23.10 $\pm$ 0.28  | 29.83 $\pm$ 0.26  |
|                      | G1     | 0.91 $\pm$ 0.03                                | 1.34 $\pm$ 0.06  | 2.85 $\pm$ 0.08   | 5.47 $\pm$ 0.20   | 8.39 $\pm$ 0.07   | 11.96 $\pm$ 0.13  |
|                      | G1F    | 20.50 $\pm$ 0.06                               | 33.01 $\pm$ 0.13 | 66.94 $\pm$ 0.16  | 129.97 $\pm$ 0.12 | 213.37 $\pm$ 0.98 | 364.11 $\pm$ 7.14 |
|                      | G1F'   | 7.51 $\pm$ 0.03                                | 11.53 $\pm$ 0.13 | 22.94 $\pm$ 0.11  | 45.98 $\pm$ 0.11  | 76.75 $\pm$ 0.48  | 132.56 $\pm$ 0.83 |
|                      | G2F    | 4.21 $\pm$ 0.03                                | 6.46 $\pm$ 0.09  | 13.29 $\pm$ 0.04  | 26.77 $\pm$ 0.33  | 42.77 $\pm$ 0.40  | 75.00 $\pm$ 1.50  |

| 1B                 | Glycan | Injection size ( $\mu\text{L}$ ) (AVG+STD) n=2 |                  |                  |                  |                  |                  |
|--------------------|--------|------------------------------------------------|------------------|------------------|------------------|------------------|------------------|
|                    |        | 1                                              | 2                | 4                | 8                | 16               | 32               |
| Relative Abundance | G0F-GN | 0.7% $\pm$ 0.0%                                | 0.8% $\pm$ 0.0%  | 0.5% $\pm$ 0.0%  | 0.5% $\pm$ 0.0%  | 0.6% $\pm$ 0.0%  | 0.5% $\pm$ 0.0%  |
|                    | G0     | 3.8% $\pm$ 0.0%                                | 3.9% $\pm$ 0.1%  | 3.5% $\pm$ 0.0%  | 3.4% $\pm$ 0.0%  | 3.6% $\pm$ 0.1%  | 2.9% $\pm$ 0.0%  |
|                    | G0F    | 47.9% $\pm$ 0.0%                               | 48.2% $\pm$ 0.1% | 48.9% $\pm$ 0.1% | 48.8% $\pm$ 0.1% | 48.8% $\pm$ 0.1% | 42.6% $\pm$ 0.2% |
|                    | Man5   | 3.0% $\pm$ 0.1%                                | 3.0% $\pm$ 0.1%  | 3.0% $\pm$ 0.1%  | 3.1% $\pm$ 0.0%  | 3.0% $\pm$ 0.1%  | 2.6% $\pm$ 0.0%  |
|                    | G1     | 1.2% $\pm$ 0.0%                                | 1.1% $\pm$ 0.1%  | 1.2% $\pm$ 0.0%  | 1.2% $\pm$ 0.0%  | 1.1% $\pm$ 0.0%  | 1.1% $\pm$ 0.0%  |
|                    | G1F    | 27.6% $\pm$ 0.0%                               | 27.8% $\pm$ 0.1% | 27.8% $\pm$ 0.0% | 27.6% $\pm$ 0.0% | 27.5% $\pm$ 0.1% | 32.1% $\pm$ 0.3% |
|                    | G1F'   | 10.1% $\pm$ 0.1%                               | 9.7% $\pm$ 0.1%  | 9.5% $\pm$ 0.0%  | 9.8% $\pm$ 0.0%  | 9.9% $\pm$ 0.0%  | 11.7% $\pm$ 0.2% |
|                    | G2F    | 5.7% $\pm$ 0.1%                                | 5.4% $\pm$ 0.1%  | 5.5% $\pm$ 0.0%  | 5.7% $\pm$ 0.1%  | 5.5% $\pm$ 0.0%  | 6.6% $\pm$ 0.1%  |

598  
599  
600 **Table 1. Relative abundance of IPC-labeled trastuzumab glycoforms during sample recovery from trap column**  
601 **cleanup prior to analytical column injection. (1A) Absolute integrated peak fluorescent intensity, and (1B) relative**  
602 **absolute abundances of glycoforms from trastuzumab biosimilar at different injection volumes diluted into 250  $\mu\text{L}$**   
603 **80% acetonitrile prepared for injection on trap column. All reported mean values are calculated with at least 2**  
604 **technical replicates ( $n \leq 2$ ). The standard deviations are also shown here.**

605  
606

607 **Graphical Abstract:**  
608

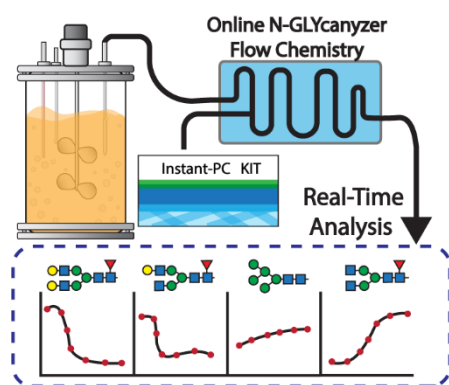

609  
610  
611  
612
